# Supplementary material for: Robust hydrogel sensor with good mechanical properties, conductivity, anti-swelling ability, water tolerance and biocompatibility
Source: Royal Society of Chemistry journal article supplement (doi:10.1039/d3gc04487d), 2024-01-01
Supplement: d3gc04487d1.pdf [file d3gc04487d1.pdf]

# **Robust hydrogel sensor with high mechanical properties, conductivity, anti-swelling ability, water tolerance and biocompatibility**

**Airong Xu<sup>a,\*</sup> Tiantian Sun,<sup>a</sup> Rukuan Liu<sup>b,\*</sup> Liuzemu Li,<sup>b</sup> Yiming Gong,<sup>a</sup> and Zhihong Xiao**

*<sup>a</sup> School of Chemistry and Chemical Engineering, Henan University of Science and Technology, Luoyang, Henan 471003, P. R. China*

*<sup>b</sup> State Key Laboratory of Utilization of Woody Oil Resource, Hunan Academy of Forestry, Changsha, Hunan 410004, P. R. China*

**Table S1** Conductivity summary of the hydrogel in this work and PVA based hydrogels reported previously

| Hydrogel                      | Conductivity ( S m <sup>-1</sup> ) | Ref.      |
|-------------------------------|------------------------------------|-----------|
| PVA/SG                        | 4.85                               | This work |
| PEDOT:PSS/PVA DN              | 0.1                                | 1         |
| PVA/SA                        | 0.3-3.62                           | 2         |
| PVA/CNF@PDA/CNT               | 0.4                                | 3         |
| TOCNF/PANI/PVA/borax (CPPH)   | 0.6                                | 4         |
| PVA/HLC/TA/Borax (PHTB)       | 0.08                               | 5         |
| PVA-PAANa-PAH                 | 0.3                                | 6         |
| PVA/CNC                       | 0.46 – 1.02                        | 7         |
| PVA-PHMG-ADSP                 | 0.125                              | 8         |
| AgNPs@CNTs/PVA/Glycerol/Borax | 0.1667                             | 9         |
| Starch/PVA/ionic liquid/GO    | 1.98                               | 10        |
| PANI@(PVA-PAA)                | 2.02                               | 11        |
| nanocellulose/PVA/carbon dot  | $2.3 \times 10^{-5}$               | 12        |
| PVA-NaCl-GL-AMY               | 3.5                                | 13        |
| PAAM/PNA/PVA/PANI             | 3.91                               | 14        |
| PVA+ P(SBMA-co-HEMA)          | 4.58                               | 15        |
| CNC-PEDOT:PSS/PVA             | 4.73                               | 16        |
| PVA/PAAS/Ca <sup>2+</sup>     | 5.2                                | 17        |
| PVA-LMPs                      | $5.4 \times 10^{-4}$               | 18        |
| PVA/HEC                       | 5.77                               | 19        |
| PVA/orthophosphoric acid      | $6.47 \times 10^{-4}$              | 20        |
| PVA/polyaniline               | 9.5, 19.0, and 20.5                | 21        |
| PVA-PEG-SA-180                | 15                                 | 22        |
| CMC/PVA                       | < 5.4                              | 23        |
| PVA-PANa                      | 1.65                               | 24        |
| PVA-PA                        | 1.34 k $\Omega$ ·cm                | 25        |
| PMZn-GL                       | 0.056                              | 26        |
| PVA/PAMAA                     | 3-15                               | 27        |
| HPC/PVA                       | 3.4                                | 28        |
| LiBr@PVAM                     | 0.62-0.95                          | 29        |
| PAM/PVA/CNF                   | 0.0297                             | 30        |

**Table S2** Summary of the stretching stress, stretching strain, elastic modulus and toughness of the hydrogel in this work and PVA based hydrogels reported previously

| Hydrogel                     | Stretching stress (MPa) | Stretching strain (%) | Elastic modulus (MPa)  | Toughness (MJ m <sup>-3</sup> ) | Ref.      |
|------------------------------|-------------------------|-----------------------|------------------------|---------------------------------|-----------|
| PVA/SG                       | 1.23                    | 387                   | 0.315                  | 2.298                           | This work |
| PVA/SA                       | 0.56-1.32               | 280-400               | 0.34-0.59              | 0.64-3.14                       | 2         |
| PVA/CNF@PDA/CNT              | 0.79                    | 335-471               | 0.02023-0.08293        | 1.26                            | 3         |
| TOCNF/PANI/PVA/borax (CPPH)  | 0.01564                 | 1530                  | a                      | a                               | 4         |
| PVA-PAANa-PAH                | 0.86                    | 768                   | 2.25                   | 2.25                            | 6         |
| PVA/CNC                      | 0.75                    | 410.47                | a                      | a                               | 7         |
| Starch/PVA/ionic liquid/GO   | 0.64                    | 657.5                 | ~ 0.275                | < 2.25                          | 10        |
| PANI@(PVA-PAA)               | 0.09051                 | a                     | 0.02373                | a                               | 11        |
| nanocellulose/PVA/carbon dot | 2.98                    | a                     | a                      | a                               | 12        |
| PVA+ P(SBMA-co-HEMA)         | < 0.4                   | < 350                 | < 0.125                | 0.518                           | 15        |
| PVA/PAAS/Ca <sup>2+</sup>    | 0.75                    | 216                   | a                      | a                               | 17        |
| PVA/polyaniline              | 1.46                    | 416                   | 4.27                   | 3.28                            | 21        |
| PVA-PEG-SA-180               | 16.1                    | 204.93                | a                      | a                               | 22        |
| PVA-PANa                     | 7.0                     | 600                   | a                      | a                               | 24        |
| PVA-PA                       | 0.5-1.5                 | 500-1100              | a                      | a                               | 25        |
| HA-PVA                       | 23.5                    | 2900                  | a                      | 210                             | 31        |
| PVA from salting-out         | 15                      | 2100                  | 2.5                    | 20                              | 32        |
| PVA/PAA from cold-drawing    | 140                     | a                     | 100                    | 117                             | 33        |
| PVA from cold-drawing        | 5                       | a                     | 0.5                    | a                               | 34        |
| PMZn-GL                      | 0.875                   | 247                   | < 1 × 10 <sup>-9</sup> | 0.082                           | 26        |
| PVA/PAMAA                    | 0.4363                  | 608                   | 0.1349                 | 0.0047                          | 27        |
| HPC/PVA                      | 1.3                     | 975                   | 0.9                    | 5.85                            | 28        |
| PAM/PVA/CNF                  | 9.43                    | 445.5                 | a                      | 15.12                           | 30        |
| PAM-PVA                      | 0.1838                  | 488                   | 0.087                  | a                               | 35        |
| PVA-gelatin-Fe <sup>3+</sup> | 2.5                     | 255                   | 0.0252                 | 7.22                            | 36        |
| PVA/PAA-PEDOT:PSS-TA         | 0.202-0.24              | 443-640               | a                      | 0.0494-0.01231                  | 37        |
| PVA-TA300                    | 9.5                     | 1000                  | ~1.7                   | a                               | 38        |

a Not investigated, and/or no data reported.

**Table S3** Summary of sensitivity (gauge factor) of the hydrogel in this work and PVA based hydrogels reported previously

| Hydrogel                   | Sensitivity (gauge factor) | Ref.      |
|----------------------------|----------------------------|-----------|
| PVA/SG                     | 0.91, 1.76                 | This work |
| PVA/CNF@PDA/CNT            | 2.29                       | 3         |
| PVA-PAANa-PAH              | 1.20, 1.64                 | 6         |
| Starch/PVA/ionic liquid/GO | 6.04                       | 10        |
| PVA+ P(SBMA-co-HEMA)       | 1.434, 2.448, and 3.356    | 15        |
| PVA/PAAS/Ca <sup>2+</sup>  | 1.58                       | 17        |
| PVA-PANa                   | 0.45                       | 24        |
| PMZn-GL                    | 3.42, 4.77, 5.82           | 26        |
| PAM/PVA/CNF                | 1.47, 2.72, 4.39,          | 30        |
| PVA/PAA-PEDOT:PSS-TA       | 1.29, 2.34                 | 37        |

**Table S4** Summary of fatigue resistance of the hydrogel in this work and PVA based hydrogels reported previously

| Hydrogel                     | Fatigue resistance | Ref.      |
|------------------------------|--------------------|-----------|
| PVA/SG                       | Yes                | This work |
| PVA/CNF@PDA/CNT              | Yes                | 4         |
| Starch/PVA/ionic liquid/GO   | Yes                | 10        |
| PANI@(PVA-PAA)               | Yes                | 11        |
| PVA/PAAS/Ca <sup>2+</sup>    | Yes                | 17        |
| PVA/polyaniline              | Yes                | 21        |
| PVA-PANa                     | Yes                | 24        |
| HA-PVA                       | Yes                | 31        |
| PVA/PAMAA                    | Yes                | 27        |
| PVA-gelatin-Fe <sup>3+</sup> | Yes                | 36        |
| PVA/PAA-PEDOT:PSS-TA         | Yes                | 37        |

**Table S5** Summary of swelling resistance and water resistance of the hydrogel in this work and PVA based hydrogels reported previously

| Hydrogel                     | Swelling resistance in water | Water resistance                                                                     | Ref.      |
|------------------------------|------------------------------|--------------------------------------------------------------------------------------|-----------|
| PVA/SG                       | Yes                          | Still remain good enough mechanical properties after six months in water             | This work |
| PVA/SA                       | Swelling                     | b                                                                                    | 2         |
| PVA-PAANa-PAH                | Swelling                     | Apparently decreased in stress and strain                                            | 6         |
| PVA+ P(SBMA-co-HEMA)         | Yes                          | Decrease in stress and strain                                                        | 15        |
| PVA/PAAS/Ca <sup>2+</sup>    | Yes                          | Still remain good enough strain, but apparently decreased stress after 24 h in water | 17        |
| PVA-PEG-SA-180               | Swelling                     | b                                                                                    | 22        |
| PVA-PANa                     | a                            | b                                                                                    | 24        |
| PVA/PAA                      | Swelling                     | Decrease in stress and strain                                                        | 34        |
| PVA/PAMAA                    | Swelling                     | b                                                                                    | 27        |
| PVA-gelatin-Fe <sup>3+</sup> | Swelling                     | b                                                                                    | 36        |

a Antiswelling in PBS buffer and 0.9% NaCl solution. b Not investigated, and/or no data reported.

## References

- [1] G. Li, K. Huang, J. Deng, M. Guo, M. Cai, Y. Zhang, C. F. Guo, *Adv. Mater.* 2022, **34**, 2200261.
- [2] X. Jiang, N. Xiang, H. Zhang, Y. Sun, Z. Lin, L. Hou, *Carbohydr. Polym.* 2018, **186**, 377.
- [3] R. Zhang, A. Yang, Y. Yang, Y. Zhu, Y. Song, Y. Li, J. Li, *Int. J. Biol. Macromol.* 2023, **245**, 125469.
- [4] Y. Qin, J. Mo, Y. Liu, S. Zhang, J. Wang, Q. Fu, S. Wang, S. Nie, *Adv. Funct. Mater.* 2022, **32**, 2201846.
- [5] H. Lei, D. Fan, *Chem. Eng. J.* 2021, **421**, 129578.
- [6] W. J. Yang, R. Zhang, X. Guo, R. Ma, Z. Liu, T. Wang, L. Wang, *J. Mater. Chem. A*

- 2022, **10**, 23649.
- [7] X. Huang, X. Ao, L. Yang, J. Ye, C. Wang, *RSC Adv.* 2023, **13**, 527.
- [8] Y. Gao, Y. Gao, Z. Zhang, F. Jia, G. Gao, *ACS Appl. Mater. Inter.* 2022, **14**, 51420.
- [9] X. Yu, W. Qin, X. Li, Y. Wang, C. Gu, J. Chen, S. Yin, *J. Mater. Chem. A* 2022, **10**, 15000.
- [10] X. Li, S. Zhang, X. Li, L. Lu, B. Cui, C. Yuan, L. Guo, B. Yu, Q. Chai, *Carbohydr. Polym.* 2023, **320**, 121262.
- [11] X. Dong, Y. Ge, K. Li, X. Li, Y. Liu, D. Xu, S. Wang, X. Gu, *Soft Matter* 2022, **18**, 9231.
- [12] Z. Wang, F. Cheng, H. Cai, X. Li, J. Sun, Y. Wu, N. Wang, Y. Zhu, *Carbohydr. Polym.* 2021, **259**, 117753.
- [13] Y. Gao, Y. Gao, Z. Zhang, Y. Wang, X. Ren, F. Jia, G. Gao, *J. Mater. Chem. C* 2022, **10**, 12873.
- [14] C. Qian, Y. Li, C. Chen, L. Han, Q. Han, L. Liu, Z. Lu, *Chem. Eng. J.* 2023, **454**, 140263.
- [15] J. Ren, Y. Liu, Z. Wang, S. Chen, Y. Ma, H. Wei, S. Lü, *Adv. Funct. Mater.* 2021, **32**, 2107404.
- [16] X. Chai, J. Tang, Y. Li, Y. Cao, X. Chen, T. Chen, Z. Zhang, *ACS Appl. Mater. Inter.* 2023, **15**, 18262.
- [17] R. Liu, K. Chen, H. Liu, Y. Liu, R. Cong, J. Guo, Y. Tian, *ACS Appl. Mater. Inter.* 2022, **14**, 51341.
- [18] M. Liao, H. Liao, J. Ye, P. Wan, L. Zhang, *ACS Appl. Mater. Inter.* 2019, **11**, 47358.
- [19] X. Wang, X. Wang, M. Pi, R. Ran, *Chem. Eng. J.* 2022, **428**, 131172.
- [20] M. Z. Kufian, S. R. Majid, A. K. Arof, *Ionics* 2007, **13**, 231.
- [21] L. Li, Y. Zhang, H. Lu, Y. Wang, J. Xu, J. Zhu, C. Zhang, T. Liu, *Nature Commun.* 2020, **11**, 62.
- [22] Y. Xu, M. Pei, J. Du, R. Yang, Y. Pan, D. Zhang, S. Qin, *New J. Chem.* 2023, **47**, 13721.
- [23] H. Patnam, S. A. Graham, P. Manchi, M. V. Paranjape, J. S. Yu, *ACS Appl. Mater. Inter.* 2023, **15**, 16768.
- [24] S. Zhang, Y. L. Li, H. J. Zhang, G. J. Wang, H. Wei, X. Y. Zhang, N. Ma, *ACS Mater.*

- Lett.* 2021, **3**, 807-814.
- [25] S. Zhang, Y. H. Zhang, B. Li, P. Zhang, L. Kan, G. J. Wang, H. Wei, X. Y. Zhang, N. Ma, *ACS Appl. Mater. Interfaces* 2019, **11**, 32441-32448.
- [26] Y. B. Feng, H. Liu, W. H. Zhu, L. Guan, X. T. Yang, A. V. Zvyagin, Y. Zhao, C. Shen, B. Yang, Q. Lin, *Adv. Funct. Mater.* 2021, **31**, 2105264.
- [27] J. R. Huang, S. J. Han, J. D. Zhu, Q. R. Wu, H. J. Chen, A. B. Chen, J. Y. Zhang, B. Huang, X. X. Yang, L. H. Guan, *Adv. Funct. Mater.* 2022, **32**, 2205708.
- [28] Y. Zhou, C. J. Wan, Y. S. Yang, H. Yang, S. C. Wang, Z. D. Dai, K. J. Ji, H. Jiang, X. D. Chen, Y. Long, *Adv. Funct. Mater.* 2018, **29**, 1806220.
- [29] A. A. M. Ismail, L. G. Ghanem, A. A. Akar, G. E. Khedr, M. Ramadan, B. S. Shaheen, N. K. Allam, *J. Mater. Chem. A* 2023, **11**, 16009–16018.
- [30] J. M. Wu, Q. Ma, Q. K. Pang, S. S. Hu, Z. H. Wan, X. F. Peng, X. Cheng, L. H. Geng, *Carbohydr. Polym.* 2023, **321**, 121282.
- [31] M. T. Hua, S. W. Wu, Y. F. Ma, Y. S. Zhao, Z. L. Chen, I. Frenkel, J. Strzalka, H. Zhou, X. Y. Zhu, X. M. He, *Nature* 2021, **590**, 594 – 599.
- [32] S. W. Wu, M. T. Hua, Y. Alsaid, Y. J. Du, Y. F. Ma, Y. S. Zhao, C.-Y. Lo, C. R. Wang, D. Wu, B. W. Yao, J. Strzalka, H. Zhou, X. Y. Zhu, X. M. He, *Adv. Mater.* 2021, **33**, 2007829.
- [33] T. Q. Liu, C. Jiao, X. Peng, Y. N. Chen, Y. Y. Chen, C. C. He, R. G. Liu, H. L. Wang, *J. Mater. Chem. B* 2018, **6**, 8105-8114.
- [34] Y. Y. Chen, C. Jiao, X. Peng, T. Q. Liu, Y. Q. Shi, M. Liang, H. L. Wang, *J. Mater. Chem. B* 2019, **00**, 1-3.
- [35] 35G. Ge, Y. Z. Zhang, J. J. Shao, W. J. Wang, W. L. Si, W. Huang, X. C. Dong, *Adv. Funct. Mater.* 2018, **28**, 1802576.
- [36] 36S. Sun, Y. Z. Xu, X. Maimaitiyiming, *Int. J. Biol. Macromol.* 2023, **249**, 125978.
- [37] 37Z. X. Zhou, W. Z. Yuan, X. Y. Xie, *Mater. Chem. Front.* 2022, **6**, 3359–3368.
- [38] 38H. L. Fan, J. H. Wang, Z. X. Jin, *Macromolecules* 2018, **51**, 1696-1705
